# Supplementary material for: Cortical Visual Performance Test Setup for Parkinson's Disease Based on Motion Blur Orientation
Source: Parkinsons Dis. 2019 Feb 3;2019:3247608. doi: 10.1155/2019/3247608 (PMC6377996; doi:10.1155/2019/3247608)
Supplement: Supplementary 1 — File 1: classification of image representations with SVM machine learning classifier MATLAB source codes. Details are included in README file. [file 3247608.f1.zip]

Archive with 100 entries (86 files):
- 2-MatlabSource/
- 2-MatlabSource/create_win_motion.m
- 2-MatlabSource/create_win_v1_s_only.m
- 2-MatlabSource/libfunc/
- 2-MatlabSource/libfunc/calc_fuzzymemb.m
- 2-MatlabSource/libfunc/calc_mcnemar.m
- 2-MatlabSource/libfunc/calc_rademacher.m
- 2-MatlabSource/libfunc/draw_RBF.m
- 2-MatlabSource/libfunc/kPCA/
- 2-MatlabSource/libfunc/kPCA/distanceMatrix.m
- 2-MatlabSource/libfunc/kPCA/kernel.m
- 2-MatlabSource/libfunc/kPCA/kernel_NewData.m
- 2-MatlabSource/libfunc/kPCA/kPCA.m
- 2-MatlabSource/libfunc/kPCA/kPCA_NewData.m
- 2-MatlabSource/libfunc/kPCA/kPCA_PreImage.m
- 2-MatlabSource/libfunc/kPCA/PCA.m
- 2-MatlabSource/libL4/
- 2-MatlabSource/libL4/image_load.m
- 2-MatlabSource/libL4/image_load20.m
- 2-MatlabSource/libL4/TH_coord.mat
- 2-MatlabSource/libL4/TH_DISPLAY.m
- 2-MatlabSource/libL4/WLAT_T65_L1.mat
- 2-MatlabSource/libL4/WLAT_T65_L3_FL4_km.mat
- 2-MatlabSource/libL4/WLAT_T675_L3_20FL4_km.mat
- 2-MatlabSource/libL4/WPX.mat
- 2-MatlabSource/libL4/WTH_T65_L1.mat
- 2-MatlabSource/libL4/WTH_T65_L3_FL4_km.mat
- 2-MatlabSource/libL4/WTH_T675_L3_20FL4_km.mat
- 2-MatlabSource/libL4/yard.mat
- 2-MatlabSource/libsvm/
- 2-MatlabSource/libsvm/COPYRIGHT
- 2-MatlabSource/libsvm/FAQ.html
- 2-MatlabSource/libsvm/heart_scale
- 2-MatlabSource/libsvm/Makefile
- 2-MatlabSource/libsvm/Makefile.win
- 2-MatlabSource/libsvm/matlab/
- 2-MatlabSource/libsvm/matlab/libsvmread.c
- 2-MatlabSource/libsvm/matlab/libsvmread.mexa64
- 2-MatlabSource/libsvm/matlab/libsvmread.mexglx
- 2-MatlabSource/libsvm/matlab/libsvmread.mexw64
- 2-MatlabSource/libsvm/matlab/libsvmwrite.c
- 2-MatlabSource/libsvm/matlab/libsvmwrite.mexa64
- 2-MatlabSource/libsvm/matlab/libsvmwrite.mexglx
- 2-MatlabSource/libsvm/matlab/libsvmwrite.mexw64
- 2-MatlabSource/libsvm/matlab/make.m
- 2-MatlabSource/libsvm/matlab/Makefile
- 2-MatlabSource/libsvm/matlab/README
- 2-MatlabSource/libsvm/matlab/svmpredict.c
- 2-MatlabSource/libsvm/matlab/svmpredict.mexa64
- 2-MatlabSource/libsvm/matlab/svmpredict.mexglx
- 2-MatlabSource/libsvm/matlab/svmpredict.mexw64
- 2-MatlabSource/libsvm/matlab/svmtrain.c
- 2-MatlabSource/libsvm/matlab/svmtrain.mexa64
- 2-MatlabSource/libsvm/matlab/svmtrain.mexglx
- 2-MatlabSource/libsvm/matlab/svmtrain.mexw64
- 2-MatlabSource/libsvm/matlab/svm_model_matlab.c
- 2-MatlabSource/libsvm/matlab/svm_model_matlab.h
- 2-MatlabSource/libsvm/python/
- 2-MatlabSource/libsvm/python/Makefile
- 2-MatlabSource/libsvm/python/README
- 2-MatlabSource/libsvm/python/svm.py
- 2-MatlabSource/libsvm/python/svmutil.py
- 2-MatlabSource/libsvm/README
- 2-MatlabSource/libsvm/svm-predict.c
- 2-MatlabSource/libsvm/svm-scale.c
- 2-MatlabSource/libsvm/svm-toy/
- 2-MatlabSource/libsvm/svm-toy/gtk/
- 2-MatlabSource/libsvm/svm-toy/gtk/callbacks.cpp
- 2-MatlabSource/libsvm/svm-toy/gtk/callbacks.h
- 2-MatlabSource/libsvm/svm-toy/gtk/interface.c
- 2-MatlabSource/libsvm/svm-toy/gtk/interface.h
- 2-MatlabSource/libsvm/svm-toy/gtk/main.c
- 2-MatlabSource/libsvm/svm-toy/gtk/Makefile
- 2-MatlabSource/libsvm/svm-toy/gtk/svm-toy.glade
- 2-MatlabSource/libsvm/svm-toy/qt/
- 2-MatlabSource/libsvm/svm-toy/qt/Makefile
- 2-MatlabSource/libsvm/svm-toy/qt/svm-toy.cpp
- 2-MatlabSource/libsvm/svm-toy/windows/
- 2-MatlabSource/libsvm/svm-toy/windows/svm-toy.cpp
- 2-MatlabSource/libsvm/svm-train.c
- 2-MatlabSource/libsvm/svm.cpp
- 2-MatlabSource/libsvm/svm.def
- 2-MatlabSource/libsvm/svm.h
- 2-MatlabSource/libsvm/svm.o
- 2-MatlabSource/libsvm/tools/
- 2-MatlabSource/libsvm/tools/checkdata.py
- 2-MatlabSource/libsvm/tools/easy.py
- 2-MatlabSource/libsvm/tools/grid.py
- 2-MatlabSource/libsvm/tools/README
- 2-MatlabSource/libsvm/tools/subset.py
- 2-MatlabSource/libsvm/windows/
- 2-MatlabSource/README.txt
- 2-MatlabSource/results/
- 2-MatlabSource/results/classification_performance.fig
- 2-MatlabSource/results/classification_performance.tif
- 2-MatlabSource/results/high_wins.fig
- 2-MatlabSource/results/high_wins.png
- 2-MatlabSource/results/low_wins.fig
- 2-MatlabSource/results/low_wins.png
- 2-MatlabSource/test_motion.m
