# Supplementary material for: Cortical Visual Performance Test Setup for Parkinson's Disease Based on Motion Blur Orientation
Source: Parkinsons Dis. 2019 Feb 3;2019:3247608. doi: 10.1155/2019/3247608 (PMC6377996; doi:10.1155/2019/3247608)
Supplement: Supplementary 1 — File 1: classification of image representations with SVM machine learning classifier MATLAB source codes. Details are included in README file. [file 3247608.f1.zip › 2-MatlabSource/libfunc/calc_fuzzymemb.m]

function f=fuzzymemb(data,center,m)
dists=pdist2(data,center);
nc=size(center,1);
c=2/(m-1);
f=zeros(size(data,1),nc);
for k=1:size(data,1)
    for i=1:nc
        f(k,i)=1/sum((dists(k,i)./dists(k,:)).^c);
    end
end
