# Supplementary material for: Cortical Visual Performance Test Setup for Parkinson's Disease Based on Motion Blur Orientation
Source: Parkinsons Dis. 2019 Feb 3;2019:3247608. doi: 10.1155/2019/3247608 (PMC6377996; doi:10.1155/2019/3247608)
Supplement: Supplementary 1 — File 1: classification of image representations with SVM machine learning classifier MATLAB source codes. Details are included in README file. [file 3247608.f1.zip › 2-MatlabSource/libfunc/calc_rademacher.m]

function [ output ] = RadComp( data, class_size )
% data column feature, row sample

b=sort(randperm(size(data,1),class_size));
data2=data(b',:)';
for trial=1:size(data2,1)
    classes=rand(1, class_size);
    for i=1:size(data,2)
        temp(i)=corr2(data2(i,:),classes);
    end
    temp(find(isnan(temp))) = 0;
    temp2=temp*data2;
    perf(trial) = (corr2(temp2, classes));
end
output=mean((perf.^2).*sign(perf));
end

% bir data seç 100 lük mesela
% 100 pencere seç her birisine random de?er ata.-1 1 aras?nda continous
% her bir de?i?ken ile korelasyon hesapla
% sonra onlar? topla
