# Supplementary material for: Cortical Visual Performance Test Setup for Parkinson's Disease Based on Motion Blur Orientation
Source: Parkinsons Dis. 2019 Feb 3;2019:3247608. doi: 10.1155/2019/3247608 (PMC6377996; doi:10.1155/2019/3247608)
Supplement: Supplementary 1 — File 1: classification of image representations with SVM machine learning classifier MATLAB source codes. Details are included in README file. [file 3247608.f1.zip › 2-MatlabSource/libfunc/draw_RBF.m]

function draw_RBF( data,gamma )
%draw_RBF by Erdem Isenkul
%   data: data matrix, columns are features-rows are samples
%   gamma: RBF gamma value to draw
aa=squareform(pdist(data)).^2;
K=exp(-aa./(2*gamma.^2));
hist(K(:),30);
end
