# Supplementary material for: Cortical Visual Performance Test Setup for Parkinson's Disease Based on Motion Blur Orientation
Source: Parkinsons Dis. 2019 Feb 3;2019:3247608. doi: 10.1155/2019/3247608 (PMC6377996; doi:10.1155/2019/3247608)
Supplement: Supplementary 1 — File 1: classification of image representations with SVM machine learning classifier MATLAB source codes. Details are included in README file. [file 3247608.f1.zip › 2-MatlabSource/libfunc/kPCA/kernel.m]

%   X: data matrix, each row is one observation, each column is one feature
%   type: type of kernel, can be 'simple', 'poly', or 'gaussian'
%   para: parameter for computing the 'poly' kernel, for 'simple'
%       and 'gaussian' it will be ignored
%   K: kernel matrix

%   Copyright by Quan Wang, 2011/05/10
%   Please cite: Quan Wang. Kernel Principal Component Analysis and its
%   Applications in Face Recognition and Active Shape Models.
%   arXiv:1207.3538 [cs.CV], 2012.

function K=kernel(X,type,para)

N=size(X,1);

if strcmp(type,'simple')
    K=X*X';
end

if strcmp(type,'quadratic')
    K=X*X'+1;
    K=K.^2;
end

if strcmp(type,'polynomial')
    K=X*X'+1;
    K=K.^3;
end

if strcmp(type,'gaussian')
    K=distanceMatrix(X).^2;
    K=exp(-K./(2*para.^2));
end
