# Supplementary material for: Cortical Visual Performance Test Setup for Parkinson's Disease Based on Motion Blur Orientation
Source: Parkinsons Dis. 2019 Feb 3;2019:3247608. doi: 10.1155/2019/3247608 (PMC6377996; doi:10.1155/2019/3247608)
Supplement: Supplementary 1 — File 1: classification of image representations with SVM machine learning classifier MATLAB source codes. Details are included in README file. [file 3247608.f1.zip › 2-MatlabSource/libsvm/Makefile]

CXX ?= g++
CFLAGS = -Wall -Wconversion -O3 -fPIC
SHVER = 2
OS = $(shell uname)

all: svm-train svm-predict svm-scale

lib: svm.o
	if [ "$(OS)" = "Darwin" ]; then \
		SHARED_LIB_FLAG="-dynamiclib -W1,-install_name,libsvm.so.$(SHVER)"; \
	else \
		SHARED_LIB_FLAG="-shared -W1,-soname,libsvm.so.$(SHVER)"; \
	fi; \
	$(CXX) $${SHARED_LIB_FLAG} svm.o -o libsvm.so.$(SHVER)

svm-predict: svm-predict.c svm.o
	$(CXX) $(CFLAGS) svm-predict.c svm.o -o svm-predict -lm
svm-train: svm-train.c svm.o
	$(CXX) $(CFLAGS) svm-train.c svm.o -o svm-train -lm
svm-scale: svm-scale.c
	$(CXX) $(CFLAGS) svm-scale.c -o svm-scale
svm.o: svm.cpp svm.h
	$(CXX) $(CFLAGS) -c svm.cpp
clean:
	rm -f *~ svm.o svm-train svm-predict svm-scale libsvm.so.$(SHVER)
