# Supplementary material for: Cortical Visual Performance Test Setup for Parkinson's Disease Based on Motion Blur Orientation
Source: Parkinsons Dis. 2019 Feb 3;2019:3247608. doi: 10.1155/2019/3247608 (PMC6377996; doi:10.1155/2019/3247608)
Supplement: Supplementary 1 — File 1: classification of image representations with SVM machine learning classifier MATLAB source codes. Details are included in README file. [file 3247608.f1.zip › 2-MatlabSource/README.txt]

- To get started change Matlab's current directory to the folder that contains all saved files.

- The main program is "test_motion": to create image representations and compute classification performance type test_motion.m in the command window and press enter. The file will then produce figure which is the classification accuracy of cortical image representations.

- To compute the program under a different set of Layer 4 parameters, change line 22-23 of "test_motion.m", in which parameter values are assigned.

- To compute the program under a different set of data size and motion blur parameters, change line 30-33 of "test_motion.m", in which parameter values are assigned.

- The folders starts with "lib*" are library function for the computations.

- Any asistance about the source code can be obtain from the corresponding author upon request.
